# Supplementary material for: Systematic review and meta-analysis of postoperative pain and symptoms control following laser haemorrhoidoplasty versus Milligan-Morgan haemorrhoidectomy for symptomatic haemorrhoids: a new standard
Source: Springer Nature journal article supplement (doi:10.1007/s00384-022-04225-4), 2022-07-29

| Study or Subgroup     | Laser Haemorrhoidoplasty |          |            | Milligan-Morgan (Open) Haemorrhoidectomy |          |            | Mean Difference |                                |
|-----------------------|--------------------------|----------|------------|------------------------------------------|----------|------------|-----------------|--------------------------------|
|                       | Mean [min]               | SD [min] | Total      | Mean [min]                               | SD [min] | Total      | Weight          | IV, Random, 95% CI             |
| Nazari 2015           | 32.8                     | 7        | 29         | 52.3                                     | 15.1     | 30         | 8.3%            | -19.50 [-25.47, -13.53]        |
| Naderan 2016          | 33.1                     | 7.3      | 30         | 52.6                                     | 15.6     | 30         | 8.1%            | -19.50 [-25.66, -13.34]        |
| Alsisy 2019           | 30.63                    | 4.9      | 30         | 50.5                                     | 10.12    | 30         | 10.6%           | -19.87 [-23.89, -15.85]        |
| Eskandaros 2020       | 22.8                     | 3.9      | 40         | 27.5                                     | 5.3      | 40         | 12.9%           | -4.70 [-6.74, -2.66]           |
| Poskus 2020           | 15                       | 7.7      | 40         | 29                                       | 13.8     | 40         | 9.5%            | -14.00 [-18.90, -9.10]         |
| Maloku 2014           | 15.94                    | 3.5      | 20         | 26.76                                    | 5.8      | 20         | 11.9%           | -10.82 [-13.79, -7.85]         |
| Maloku 2019           | 16.5                     | 1.9      | 100        | 27.2                                     | 6.5      | 100        | 13.5%           | -10.70 [-12.03, -9.37]         |
| Hassan 2021           | 15.9                     | 3.5      | 20         | 26.8                                     | 5.8      | 20         | 11.9%           | -10.90 [-13.87, -7.93]         |
| Khan 2021             | 23.2                     | 1.9      | 50         | 34.3                                     | 5.5      | 50         | 13.3%           | -11.10 [-12.71, -9.49]         |
| <b>Total (95% CI)</b> |                          |          | <b>359</b> |                                          |          | <b>360</b> | <b>100.0%</b>   | <b>-12.74 [-15.43, -10.05]</b> |

Heterogeneity: Tau<sup>2</sup> = 13.50; Chi<sup>2</sup> = 71.37, df = 8 (P < 0.00001); I<sup>2</sup> = 89%  
 Test for overall effect: Z = 9.29 (P < 0.00001)

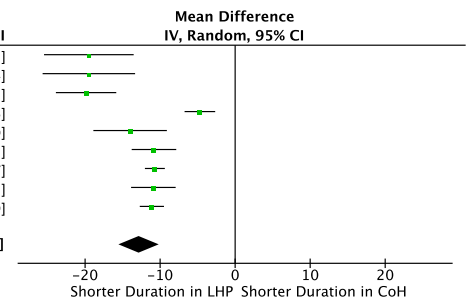

Supplement: MOESM1 [file 23317870]
