# Supplementary material for: Systematic review and meta-analysis of postoperative pain and symptoms control following laser haemorrhoidoplasty versus Milligan-Morgan haemorrhoidectomy for symptomatic haemorrhoids: a new standard
Source: Springer Nature journal article supplement (doi:10.1007/s00384-022-04225-4), 2022-07-29

| Study or Subgroup     | Laser Haemorrhoidoplasty |            | Milligan-Morgan (Open) Haemorrhoidectomy |            | Total         | Weight                   | Risk Ratio          |                     |
|-----------------------|--------------------------|------------|------------------------------------------|------------|---------------|--------------------------|---------------------|---------------------|
|                       | Events                   | Total      | Events                                   | Total      |               |                          | M-H, Random, 95% CI | M-H, Random, 95% CI |
| Alsisy 2019           | 0                        | 30         | 4                                        | 30         | 25.1%         | 0.11 [0.01, 1.98]        |                     |                     |
| Eskandaros 2020       | 0                        | 40         | 2                                        | 40         | 23.0%         | 0.20 [0.01, 4.04]        |                     |                     |
| Mohammed 2019         | 0                        | 500        | 30                                       | 500        | 26.7%         | 0.02 [0.00, 0.27]        |                     |                     |
| Khan 2021             | 0                        | 50         | 5                                        | 50         | 25.3%         | 0.09 [0.01, 1.60]        |                     |                     |
| <b>Total (95% CI)</b> |                          | <b>620</b> |                                          | <b>620</b> | <b>100.0%</b> | <b>0.07 [0.02, 0.31]</b> |                     |                     |
| Total events          | 0                        |            | 41                                       |            |               |                          |                     |                     |

Heterogeneity: Tau<sup>2</sup> = 0.00; Chi<sup>2</sup> = 2.00, df = 3 (P = 0.57); I<sup>2</sup> = 0%  
 Test for overall effect: Z = 3.57 (P = 0.0004)

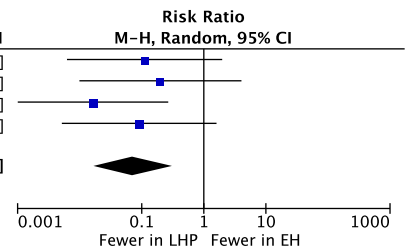

Supplement: MOESM3 [file 23317870]
