# Supplementary material for: Systematic review and meta-analysis of postoperative pain and symptoms control following laser haemorrhoidoplasty versus Milligan-Morgan haemorrhoidectomy for symptomatic haemorrhoids: a new standard
Source: Springer Nature journal article supplement (doi:10.1007/s00384-022-04225-4), 2022-07-29

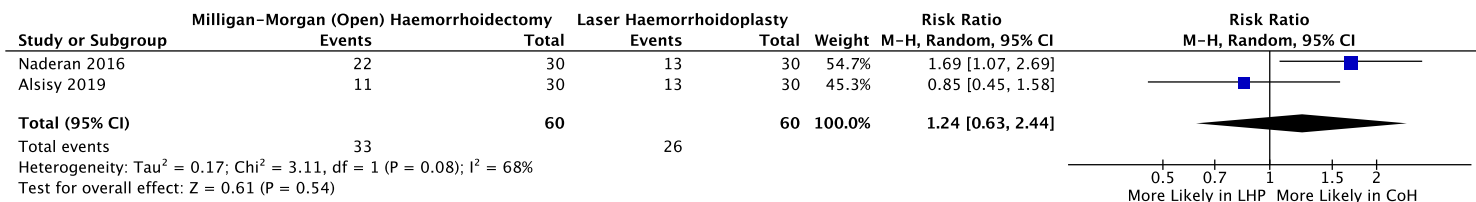

Supplement: MOESM8 [file 23317870]
