# Supplementary material for: Systematic review and meta-analysis of postoperative pain and symptoms control following laser haemorrhoidoplasty versus Milligan-Morgan haemorrhoidectomy for symptomatic haemorrhoids: a new standard
Source: Springer Nature journal article supplement (doi:10.1007/s00384-022-04225-4), 2022-07-29

| Study or Subgroup     | Milligan-Morgan (Open) Haemorrhoidectomy |          |           | Laser Haemorrhoidoplasty |          |           | Weight        | Mean Difference<br>IV, Random, 95% CI |
|-----------------------|------------------------------------------|----------|-----------|--------------------------|----------|-----------|---------------|---------------------------------------|
|                       | Mean [Day]                               | SD [Day] | Total     | Mean [Day]               | SD [Day] | Total     |               |                                       |
| Naderan 2016          | 7                                        | 2.2      | 30        | 5.4                      | 1.9      | 30        | 55.6%         | 1.60 [0.56, 2.64]                     |
| Poskus 2020           | 8.03                                     | 3.65     | 40        | 4.97                     | 2.74     | 40        | 44.4%         | 3.06 [1.65, 4.47]                     |
| <b>Total (95% CI)</b> |                                          |          | <b>70</b> |                          |          | <b>70</b> | <b>100.0%</b> | <b>2.25 [0.83, 3.67]</b>              |

Heterogeneity: Tau<sup>2</sup> = 0.66; Chi<sup>2</sup> = 2.66, df = 1 (P = 0.10); I<sup>2</sup> = 62%  
Test for overall effect: Z = 3.10 (P = 0.002)

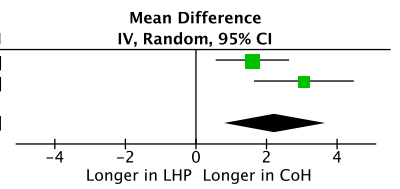

Supplement: MOESM9 [file 23317870]
