# Supplementary material for: Systematic review and meta-analysis of postoperative pain and symptoms control following laser haemorrhoidoplasty versus Milligan-Morgan haemorrhoidectomy for symptomatic haemorrhoids: a new standard
Source: Springer Nature journal article supplement (doi:10.1007/s00384-022-04225-4), 2022-07-29

| Study or Subgroup     | Milligan-Morgan (Open) Haemorrhoidectomy |         |            | Laser Haemorrhoidoplasty |         |            | Weight        | Mean Difference<br>IV, Random, 95% CI |
|-----------------------|------------------------------------------|---------|------------|--------------------------|---------|------------|---------------|---------------------------------------|
|                       | Mean [mg]                                | SD [mg] | Total      | Mean [mg]                | SD [mg] | Total      |               |                                       |
| Nazari 2015           | 16.2                                     | 6.94    | 30         | 11.33                    | 4.86    | 29         | 3.5%          | 4.87 [1.82, 7.92]                     |
| Naderan 2016          | 10.2                                     | 3.4     | 30         | 4.8                      | 1.9     | 30         | 16.7%         | 5.40 [4.01, 6.79]                     |
| Alsisy 2019           | 7.4                                      | 2.55    | 30         | 2.87                     | 1.55    | 30         | 28.4%         | 4.53 [3.46, 5.60]                     |
| Khan 2021             | 7.8                                      | 2.5     | 50         | 2.9                      | 1.4     | 50         | 51.4%         | 4.90 [4.11, 5.69]                     |
| <b>Total (95% CI)</b> |                                          |         | <b>140</b> |                          |         | <b>139</b> | <b>100.0%</b> | <b>4.88 [4.31, 5.45]</b>              |

Heterogeneity: Tau<sup>2</sup> = 0.00; Chi<sup>2</sup> = 0.95, df = 3 (P = 0.81); I<sup>2</sup> = 0%  
 Test for overall effect: Z = 16.79 (P < 0.00001)

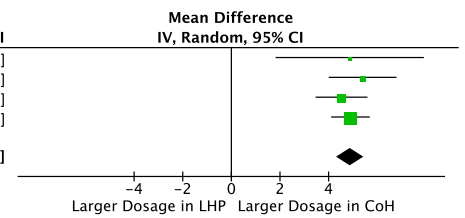

Supplement: MOESM10 [file 23317870]
