# Supplementary material for: Systematic review and meta-analysis of postoperative pain and symptoms control following laser haemorrhoidoplasty versus Milligan-Morgan haemorrhoidectomy for symptomatic haemorrhoids: a new standard
Source: Springer Nature journal article supplement (doi:10.1007/s00384-022-04225-4), 2022-07-29

| Study or Subgroup     | Laser Haemorrhoidoplasty |          |            | Milligan-Morgan (Open) Haemorrhoidectomy |          |            | Total         | Weight                     | Mean Difference<br>IV, Random, 95% CI |
|-----------------------|--------------------------|----------|------------|------------------------------------------|----------|------------|---------------|----------------------------|---------------------------------------|
|                       | Mean [Day]               | SD [Day] | Total      | Mean [Day]                               | SD [Day] | Total      |               |                            |                                       |
| Alsisy 2019           | 1.1                      | 0.31     | 30         | 1.2                                      | 0.41     | 30         | 25.1%         | -0.10 [-0.28, 0.08]        |                                       |
| Shabahang 2019        | 1.5                      | 0.55     | 40         | 1.7                                      | 0.65     | 40         | 24.5%         | -0.20 [-0.46, 0.06]        |                                       |
| Eskandaros 2020       | 0.7                      | 0.3      | 40         | 2.1                                      | 0.6      | 40         | 24.9%         | -1.40 [-1.61, -1.19]       |                                       |
| Khan 2021             | 1.1                      | 0.3      | 50         | 1.2                                      | 0.3      | 50         | 25.5%         | -0.10 [-0.22, 0.02]        |                                       |
| <b>Total (95% CI)</b> |                          |          | <b>160</b> |                                          |          | <b>160</b> | <b>100.0%</b> | <b>-0.45 [-1.03, 0.14]</b> |                                       |

Heterogeneity: Tau<sup>2</sup> = 0.35; Chi<sup>2</sup> = 123.39, df = 3 (P < 0.00001); I<sup>2</sup> = 98%  
 Test for overall effect: Z = 1.50 (P = 0.13)

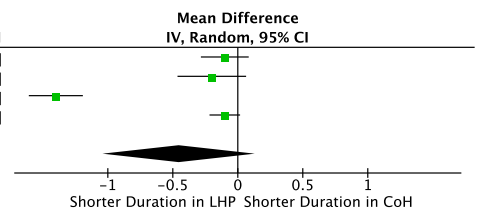

Supplement: MOESM11 [file 23317870]
