# Supplementary material for: Systematic review and meta-analysis of postoperative pain and symptoms control following laser haemorrhoidoplasty versus Milligan-Morgan haemorrhoidectomy for symptomatic haemorrhoids: a new standard
Source: Springer Nature journal article supplement (doi:10.1007/s00384-022-04225-4), 2022-07-29
Supplement: MOESM19 [file 23317870]

### **Egger's regression intercept**

|                            |           |
|----------------------------|-----------|
| Intercept                  | -11.78187 |
| Standard error             | 7.10436   |
| 95% lower limit (2-tailed) | -31.50674 |
| 95% upper limit (2-tailed) | 7.94300   |
| t-value                    | 1.65840   |
| df                         | 4.00000   |
| P-value (1-tailed)         | 0.08629   |
| P-value (2-tailed)         | 0.17258   |
